# Supplementary material
Source: HighWire-hosted journal article supplement (https://erj.ersjournals.com/content/56/6/2002364)
Supplement: inline-supplementary-material-1 [file inline-supplementary-material-1.pdf]

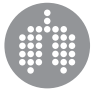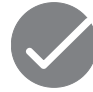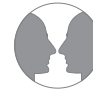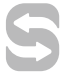

SHAREABLE PDF

# Impact of socioeconomic status in patients hospitalised for COVID-19 in the Greater Paris area

Lucile Sesé<sup>1</sup>, Yann Nguyen<sup>2</sup>, Etienne Giroux Leprieur<sup>3</sup>, Isabella Annesi-Maesano<sup>4</sup>, Catherine Cavalin<sup>5</sup>, Jeanne Goupil de Bouillé<sup>6</sup>, Louis Demestier<sup>7</sup>, Robin Dhote<sup>8</sup>, Yacine Tandjaoui-Lambiotte<sup>9</sup>, Adeline Bauvois<sup>10</sup>, Marion Pépin<sup>11</sup>, Sonja Curac<sup>12</sup>, Sébastien Beaune<sup>13</sup>, Boris Duchemann<sup>14,16</sup> and Hilario Nunes<sup>15,16</sup>

**Affiliations:** <sup>1</sup>Dept of Physiology and Pulmonology, Avicenne Hospital, Assistance Publique-Hôpitaux de Paris, Sorbonne University of Paris Nord, Bobigny, France. <sup>2</sup>Dept of Internal Medicine, Beaujon Hospital, Assistance Publique-Hôpitaux de Paris, University of Paris, Clichy, France. <sup>3</sup>Dept of Pulmonology and Thoracic Oncology, Ambroise Paré Hospital, Assistance Publique-Hôpitaux de Paris, Paris-Saclay University UVSQ, EA 4340 BECCOH, Boulogne, France. <sup>4</sup>Epidemiology of Allergic and Respiratory Diseases Dept, Institute Pierre Louis of Epidemiology and Public Health, INSERM, and UPMC Sorbonne Université, Medical School Saint Antoine, Paris, France. <sup>5</sup>Social Science Research Institute (IRISSO, UMR CNRS-INRA 7170-1427), Paris-Dauphine University, PSL, Paris, France. <sup>6</sup>Dept of Infectious Diseases, Avicenne Hospital, Assistance Publique-Hôpitaux de Paris, Sorbonne University of Paris Nord, Bobigny, France. <sup>7</sup>Dept of Gastroenterology and Pancreatology, Beaujon Hospital, Assistance Publique-Hôpitaux de Paris, University of Paris, Clichy, France. <sup>8</sup>Dept of Internal Medicine, Avicenne Hospital, Assistance Publique-Hôpitaux de Paris, Sorbonne University of Paris Nord, Bobigny, France. <sup>9</sup>Dept of Reanimation, Avicenne Hospital, Assistance Publique-Hôpitaux de Paris, Sorbonne University of Paris Nord, Bobigny, France. <sup>10</sup>Dept of Infectious Diseases, Ambroise Paré Hospital, Assistance Publique-Hôpitaux de Paris, Paris-Saclay University UVSQ, EA 4340 BECCOH, Boulogne, France. <sup>11</sup>Dept of Geriatrics, Ambroise Paré Hospital, Assistance Publique-Hôpitaux de Paris, Paris-Saclay University UVSQ, EA 4340 BECCOH, Boulogne, France. <sup>12</sup>Emergency Dept, Beaujon Hospital, Assistance Publique-Hôpitaux de Paris, University of Paris, Clichy, France. <sup>13</sup>Emergency Dept, Ambroise Paré Hospital, Assistance Publique-Hôpitaux de Paris, Paris-Saclay University UVSQ, EA 4340 BECCOH, Boulogne, France. <sup>14</sup>Dept of Oncology, Avicenne Hospital, Assistance Publique-Hôpitaux de Paris, Sorbonne University of Paris Nord, Bobigny, France. <sup>15</sup>Dept of Pulmonology, Avicenne Hospital, Assistance Publique-Hôpitaux de Paris, Sorbonne University of Paris Nord, INSERM1272, Bobigny, France. <sup>16</sup>Both authors contributed equally.

**Correspondence:** Lucile Sesé, Service de Pneumologie, Hôpital Avicenne, 125 rue de Stalingrad, 93009 Bobigny, France. E-mail: lucile.sese@aphp.fr

 @ERSpublications

**Individual precarity seems to be associated with the initial severity of COVID-19 in hospitalised patients under the age of 70 years. Low socioeconomic status may contribute to the excess mortality observed in the poorest district of Greater Paris.** <https://bit.ly/3kuStXS>

**Cite this article as:** Sesé L, Nguyen Y, Giroux Leprieur E, *et al.* Impact of socioeconomic status in patients hospitalised for COVID-19 in the Greater Paris area. *Eur Respir J* 2020; 56: 2002364 [<https://doi.org/10.1183/13993003.02364-2020>].

This single-page version can be shared freely online.

*To the Editor:*

In the USA, coronavirus disease 2019 (COVID-19) is more likely to affect and kill African Americans [1], which raises the question of the contribution of several factors, including genetic background, socioeconomic status (SES), and comorbidities [2]. According to the French National Institute of Statistics

and Economic Studies (INSEE) the highest excess mortality rate in France, during March and April 2020, linked to COVID-19 was found in the Seine-Saint-Denis (SSD) district [3]. SSD is the poorest district of Greater Paris [4]. We hypothesise that precarity influences the initial severity of COVID-19.
